# Supplementary material
Source: publisher figshare collection journal article supplement (https://acs.figshare.com/ndownloader/files/12757454)
Supplement: Supplementary file 1 [file 12757454]

## Supporting Information

### Nanosheet Synthesis of Metal Organic Frameworks in a Sandwich-Like Reaction Field for Enhanced Gate-Opening Pressures

Takeru Omiya, Koki Sasaki, Yoshiaki Uchida\*, Norikazu Nishiyama

Graduate School of Engineering Science, Osaka University, Toyonaka, Osaka 560-8531  
(Japan)

E-mail: yuchida@cheng.es.osaka-u.ac.jp

Keywords: nanosheet; liquid crystal; metal organic framework; gas adsorption

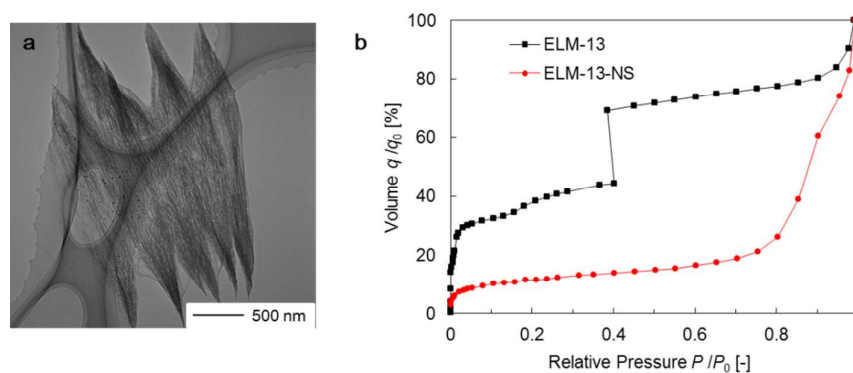

**Figure S1.** Synthesized NSs of ELM-13 and adsorption behaviors. (a) TEM photograph of the synthesized ELM-13-NSs. (b)  $N_2$  adsorption measurements at 77 K for the ELM-13-NSs.

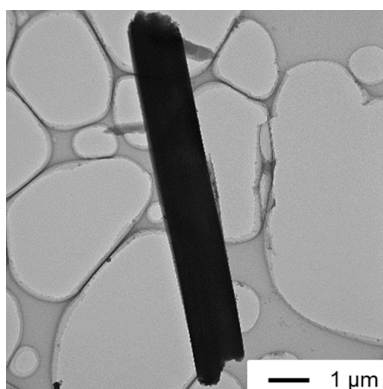

**Figure S2.** TEM photograph of one of the synthesized ELM-11.
